# Supplementary material for: Genetic Diversity and Genome-Wide Association Study of Yellow Rust Resistance in Elite Spring Bread Wheat Genotypes in Ethiopia
Source: Research Square preprint supplement (doi:10.21203/rs.3.rs-7378917/v1), 2025-09-04
Supplement: Supplementary file 1 [file 8c6a6a5c0aebfb1c45bb377c.docx]

Additional file 1: Supplementary Table 1. List of bread wheat association panel used for genetic diversity and GWAS for yellow rust

| G–code | Name/Pedigree | Selection History |
| --- | --- | --- |
| G-1 | 02W50807/RSMF8 704//MACE | ISBW14S-85 -0SD-010KUL-1KUL-0KUL |
| G-2 | ACHTAR*3//KANZ/KS85-8-4/3/KATILA-17/4/MON'S'/ALD'S'//ALDAN'S'/IAS58/5/HUBARA-1/GOUMRIA-8/6/HIDDAB/ATTILA-7 | ICARC-WIP13050-0TR-0TR-5TR |
| G-3 | ACHTAR*3//KANZ/KS85-8-4/3/KATILA-17/4/MON'S'/ALD'S'//ALDAN'S'/IAS58/5/HUBARA-1/GOUMRIA-8/6/HIDDAB/ATTILA-7 | ICARC-WIP13050-020KUL-030DZ-1TR |
| G-4 | DUCULA/KAUZ//WEAVER/4/KRONSTAD/3/FRET2/KUKUNA//FRET2 | ISBW14S-10 -0SD-010KUL-3KUL-0KUL |
| G-5 | FLORKWA-2/6/SAKER'S'/5/RBS/ANZA/3/KVZ/HYS//YMH/TOB/4/BOW'S'/7/DAJAJ-6/8/SAKHA-94 | ICARC-WIP12124-13KUL-05DZ-5TR |
| G-6 | FLORKWA-2/6/SAKER'S'/5/RBS/ANZA/3/KVZ/HYS//YMH/TOB/4/BOW'S'/7/DAJAJ-6/8/SAKHA-94 | ICARC-WIP12124-13KUL-05DZ-2TR |
| G-7 | GEMMIZA-12/4/ATTILA 50Y//ATTILA/BCN/3/STAR*3/MUSK-3 | ICARC-WIP13205-0TR-0TR-5TR |
| G-8 | GIRWILL-13/2*PASTOR-2//GEMMIZA-9/3/MISR-1 | ICARC-WIP13259-020KUL-030DZ-8TR |
| G-9 | GOUMRIA-3//MILAN/MUNIA/3/MILAN/KAUZ//HD29/2*WEAVER | ICW 11-20052-3AP-0TR-2TR |
| G-10 | HUBARA-1/3/MUNIA/CHTO//MILAN/4/GOUMRIA-8/5/WARDA | ISBW13-449-0TR-0TR-5TR |
| G-11 | HUBARA-15/ZEMAMRA-8//Mace | ISBW14-721-161 |
| G-12 | HUBARA-16/2*SOMAMA-3//HUBARA-3*2/SHUHA-4 | ICARC-WIP13316-020KUL-030DZ-5TR |
| G-13 | HUBARA-16/6/ALD/CEP75630//CEP75234/PT7219/3/BUC/BJY/4/CBRD/5/TNMU/PF85487/7/OASIS/SKAUZ//4*BCN/3/2*PASTOR | ICW 11-20053-5AP-0TR-1TR |
| G-14 | HUBARA-3*2/SHUHA-4//AKBAR | ISBW13-423-0TR-0TR-1TR |
| G-15 | HUBARA-3*2/SHUHA-4//BASHIR | ISBW13-305-0TR-0TR-2TR |
| G-16 | HUBARA-3*2/SHUHA-4//BASHIR | ISBW13-305-0TR-0TR-4TR |
| G-17 | HUBARA-3*2/SHUHA-4//BERKUME | ISBW13-288-0TR-0TR-1TR |
| G-18 | HUBARA-3*2/SHUHA-4//HIDDAB/FLORKWA-2 | ISBW13-304-020KUL-030DZ-3TR |
| G-19 | HUBARA-3*2/SHUHA-4//HUBARA-3*2/SHUHA-4 | ISBW13-309-0TR-0TR-1TR |
| G-20 | HUBARA-3*2/SHUHA-4//KABEER | ISBW13-284-0TR-0TR-2TR |
| G-21 | HUBARA-3*2/SHUHA-4//MURAJ | ISBW13-282-0TR-0TR-5TR |
| G-22 | HUBARA-3*2/SHUHA-4//NADIA-1 | ISBW13-292-0TR-0TR-2TR |
| G-23 | HUBARA-3*2/SHUHA-4//NARC 2011 | ISBW13-427-0TR-0TR-3TR |
| G-24 | HUBARA-3*2/SHUHA-4//TOROS | ISBW13-283-0TR-0TR-6TR |
| G-25 | HUBARA-3*2/SHUHA-4//TOROS | ISBW13-297-020KUL-030DZ-1TR |
| G-26 | HUBARA-3*2/SHUHA-4/4/URES/BOW//OPATA/3/GIRWILL-7 | ISBW13-267-020KUL-030DZ-5TR |
| G-27 | HUBARA-3/SHUHA-4//INQALAB 91/FLAG-2 | ICW 11-01002-0TR-0TR-3TR |
| G-28 | HUBARA-3/SHUHA-4//REYNA-21 | ICW 11-00997-0TR-0TR-3TR |
| G-29 | HUBARA-5/PASTOR-2/3/SHI#4414/CROWS"//GK SAGVARI/CA80DEBEIRA DEBEIRA | ISBW13-067-0TR-0TR-2TR |
| G-30 | HUBARA-5/PASTOR-2/6/88ZHONG218//CTK/VEE/3/KVZ/GV//PR/4/KRASNOVODOPADSKAYA25/5/KS82117/MLT | ISBW13-065-020KUL-030DZ-5TR |
| G-31 | HUBARA-5/PASTOR-5//ZANDER-17/SIDS-DEBEIRA | ISBW13-004-0TR-0TR-1TR |
| G-32 | HUBARA-8/3/MUNIA/ALTAR 84//MILAN/4/ANGI-2/5/BOH4/7/WA476/3/391//NUM/5/W22/5/ANA/6/TAM200/KASYAN | ISBW13-708-020KUL-030DZ-3TR |
| G-33 | KAUZ//ALTAR 84/AOS/3/MILAN/KAUZ/4/HUITES/5/KIRITATI/6/KAUZ//ALTAR 84/AOS/3/MILAN/KAUZ/4/HUITES/7/CROC-1/AE.SQUARROSA (224)//OPATA/3/QAFZAH-21/4/SOMAMA-3 | ICW 11-00597-0TR-0TR-3TR |
| G-34 | KAUZ//TRAP#1/BOW/3/QAFZAH-21/4/MILAN/SHA7*2//KAUZ | ISBW13-388-020KUL-030DZ-4TR |
| G-35 | MELLAL-1/OUEDZEM-1//HUBARA-3*2/SHUHA-4 | ISBW13-114-0TR-0TR-1TR |
| G-36 | MELLAL-1/OUEDZEM-1//JOUDI | ISBW13-121-020KUL-030DZ-4TR |
| G-37 | MISKEET-18/3/CBRD/WBLL1//PANDION/5/ALD/COC//URES/3/DUCULA/4/METSO | ISBW14T-139 -0SD-010KUL-3KUL-0KUL |
| G-38 | MUNIA//CHEN/ALTAR 84/3/CHEN/AEGILOPS SQUARROSA (TAUS)//BCN/4/MARCHOUCH-8/5/JOUDI | ISBW13-180-0TR-0TR-1TR |
| G-39 | NEJMAH-12/Mace | ISBW14-479-19 |
| G-40 | NESSER/SERI//TEVEE-1/SHUHA-6/3/AFIF | ISBW13-167-0TR-0TR-2TR |
| G-41 | NESSER/SERI//TEVEE-1/SHUHA-6/3/FAKHER | ISBW13-166-0TR-0TR-2TR |
| G-42 | Pirsabak 2008/AKRAM | ISBW13-477-020KUL-030DZ-3TR |
| G-43 | PRL/2*PASTOR//SERI/4/MILAN/KAUZ//PRINIA/3/BABAX/5/HUBARA-3*2/SHUHA-4/6/KAMB2/PANDION | ISBW14T-10 -0SD-010KUL-3KUL-0KUL |
| G-44 | PRL/2*PASTOR//SERI/4/MILAN/KAUZ//PRINIA/3/BABAX/5/HUBARA-3*2/SHUHA-4/6/KAMB2/PANDION | ISBW14T-10 -0SD-010KUL-2KUL-0KUL |
| G-45 | QAFZAH-33/FLORKWA-2//Excalibur/3/DOUKKALA-33 | ISBW14T-205 -0SD-010KU-4KUL-0KUL |
| G-46 | QAFZAH-33/FLORKWA-2//Excalibur/3/DOUKKALA-33 | ISBW14T-205 -0SD-010KU-5KUL-0KUL |
| G-47 | REBWAH-12/5/ATTILA/3/URES/PRL//BAV92/4/WBLL1 | ICW 11-00386-0TR-0TR-3TR |
| G-48 | REYNA-13/MASSIRA//SOONOT-10 | ICW 11-20006-1AP-0TR-2TR |
| G-49 | REYNA-4//TRACHA-2/SHUHA-3/3/SOONOT-10 | ICW 11-20308-2AP-0TR-2TR |
| G-50 | SERI.1B*2/3/KAUZ*2/BOW//KAUZ/4/ATTILA/HEILO/5/TAN//TEMPORALERA M 87/AGR/3/NG8319//SHA4/LIRA | ICW 11-20034-10AP-0TR-4TR |
| G-51 | SOONOT-10/JELMOUD-1//SOONOT-7 | ICW 11-20831-7AP-0TR-3TR |
| G-52 | SUNTOP/4/SERI.1B*2/3/KAUZ*2/BOW//KAUZ | ISBW14S-26 -0SD-010KUL-4KUL-0KUL |
| G-53 | TEVEE-1/STAR'S'/3/ACHTAR*3//KANZ/KS85-8-4/4/SAKHA-93 | ISBW13-231-0TR-0TR-4TR |
| G-54 | URES/BOW//OPATA/3/GIRWILL-7/4/AREEJ | ISBW13-040-0TR-0TR-5TR |
| G-55 | VEE#8//JUP/BJY/3/F3.71/TRM/4/BCN/5/KAUZ/6/PASTOR/7/PASTOR/8/SOONOT-5/9/QAFZAH-33/FLORKWA-2 | ICW 11-20257-1AP-0TR-2TR |
| G-56 | ATTILA*2/PBW65*2/5/KAUZ//ALTAR 84/AOS/3/MILAN/KAUZ/4/HUITES/6/WEEBILL-1/2*QAFZAH-21 | ICW 11-00568-0TR-0TR-3TR |
| G-57 | HUBARA-15/ZEMAMRA-8//Mace | ISBW14-721-149 |
| G-58 | HUBARA-16/2*SOMAMA-3//QAFZAH-33 | ICW 11-00920-0TR-0TR-3TR |
| G-59 | HUBARA-3*2/SHUHA-4//CHAM-8 | ISBW13-266-0TR-0TR-1TR |
| G-60 | HUBARA-3*2/SHUHA-4//KRASNOVODOPADSKAYA25/GRU-47 | ISBW13-286-0TR-0TR-5TR |
| G-61 | HUBARA-3/SHUHA-4//AZAMAH-1 | ICW 11-01004-0TR-0TR-2TR |
| G-62 | HUBARA-5/PASTOR-2/3/HOOSAM-8//CHAM-6/FLORKWA-2 | ICARC-WIP12063-10KUL-05DZ-3TR |
| G-63 | KARAWAN-1/TALLO 3//JADIDA-2/3/TOROS | ISBW13-197-0TR-0TR-4TR |
| G-64 | PASTOR-2/KATILA-13//HAMAM-5/3/9DEBEIRA | ISBW13-364-0TR-0TR-1TR |
| G-65 | Pirsabak 2008/AKRAM | ISBW13-477-020KUL-030DZ-1TR |
| G-66 | QAFZAH-33/FLORKWA-2//Excalibur/3/DOUKKALA-33 | ISBW14T-205 -0SD-010KU-2KUL-0KUL |
| G-67 | QAMAR-2/3/RDWG/MILAN//MURGA | ICW 11-00443-0TR-0TR-2TR |
| G-68 | SAAMID-3/OUASSOU-20 | ICW 11-01208-0TR-0TR-3TR |
| G-69 | 02W50807/RSMF8 704//DOUMA 2 | ISBW14-73-0TR -0SD-010KUL-5MR-0MR |
| G-70 | SHAMISS-5//HEILO/MIRIAM 41/3/ICARDA-SRRL-5 | ICW 11-20411-5AP -0SD -0SD-05KUL-2MR-0MR |
| G-71 | SHARP/3/PRL/SARA//TSI/VEE#5/5/VEE/LIRA//BOW/3/BCN/4/KAUZ/6/MILAN/PASTOR/7/SUDAN#3/SHUHA-6 | ICW 11-20095-5AP -0SD -0SD-05KUL-1MR-0MR |
| G-72 | SW89-5124*2/FASAN/3/CAZO/KAUZ//KAUZ/4/WBLL1/5/TNMU/CBRD//MILAN/SHA7 | ISBW13T-086-0TR -0SD-010KUL-1MR-0MR |
| G-73 | 02W50807_1/4/BL2064//SW89.5124*2/FASAN/3/TILHI/5/HUBARA-3*2/SHUHA-4 | ISBW14-579-0TR -0SD-010KUL-2MR-0MR |
| G-74 | SANDALL-5*2/CHAM-6 | ICW 11-20642-2AP -0SD -0SD-05KUL-6MR-0MR |
| G-75 | TAZA-2/LAKTA-5//HAAMA-11/7/CADET/6/YUMAI13/5/NAI60/4/14.5/3/ODIN//CI13441/CANON | ISBW13-709-0TR -0SD -0SD-05KUL-5MR-0MR |
| G-76 | 02W50807/4/PFAU/SERI.1B//AMAD/3/WAXWING/5/AGT-YOUNG | ISBW14-114-0TR -0SD-010KUL-5MR-0MR |
| G-77 | HUBARA-3*2/SHUHA-4//AREEJ | ISBW13-298-0TR -0SD -0SD-05KUL-6MR-0MR |
| G-78 | 02W50807_1/4/BL2064//SW89.5124*2/FASAN/3/TILHI/5/HUBARA-3*2/SHUHA-4 | ISBW14-779-0TR -0SD-010KUL-2MR-0MR |
| G-79 | SW89-5124*2/FASAN/3/CAZO/KAUZ//KAUZ/4/WBLL1/5/TNMU/CBRD//MILAN/SHA7 | ISBW13T-086-0TR -0SD-010KUL-6MR-0MR |
| G-80 | 02W50807/RSMF8 704//DOUMA 2 | ISBW14-73-0TR -0SD-010KUL-3MR-0MR |
| G-81 | 05W90045/SOKOLL | ISBW14-833-0TR -0SD-010KUL-2MR-0MR |
| G-82 | SHARP/3/PRL/SARA//TSI/VEE#5/5/VEE/LIRA//BOW/3/BCN/4/KAUZ/6/K7684.1/PRINIA | ICW 12-20246-0TR -0SD-010KUL-2MR-0MR |
| G-83 | 02W50807/4/PFAU/SERI.1B//AMAD/3/WAXWING/5/GUARDIAN | ISBW14-498-0TR -0SD-010KUL-4MR-0MR |
| G-84 | CHAM6/ATTILA//PASTOR/3/KAMB2/PANDION | ICW 12-20498-0TR -0SD-010KUL-4MR-0MR |
| G-85 | 02W50807/RSMF8 704//HAMAM-4 | ISBW14-91-0TR -0SD-010KUL-3MR-0MR |
| G-86 | HUBARA-3*2/SHUHA-4//HIDDAB/FLORKWA-2 | ISBW13-304-0TR -0SD -0SD-05KUL-4MR-0MR |
| G-87 | 02W50807/RSMF8 704//HAMAM-4 | ISBW14-94-0TR -0SD-010KUL-1MR-0MR |
| G-88 | 02W50807_1/4/BL2064//SW89.5124*2/FASAN/3/TILHI/5/REEHAB-2 | ISBW14-616-0TR -0SD-010KUL-3MR-0MR |
| G-89 | 02W50807_1/RSMF8 704//REEHAB-2 | ISBW14-549-0TR -0SD-010KUL-4MR-0MR |
| G-90 | 02W50807/4/BL2064//SW89.5124*2/FASAN/3/TILHI/5/DOUMA 2 | ISBW14-96-0TR -0SD-010KUL-8MR-0MR |
| G-91 | HUBARA-3*2/SHUHA-4//REEVES | ISBW14-839-0TR -0SD-010KUL-5MR-0MR |
| G-92 | CACHANILLA F2000*2/3/IRIHEA/BABAX//PASTOR/4/BURRION | ISBW14-51-0TR -0SD-010KUL-3MR-0MR |
| G-93 | AGUILAL/FLAG-3/5/CNO79//PF70354/MUS/3/PASTOR/4/CROC-1/AE.SQUARROSA (224)//OPATA/6/MILAN/KAUZ//PASTOR/3/PASTOR | ICW 11-20209-3AP -0SD -0SD-05KUL-3MR-0MR |
| G-94 | SW89-5124*2/FASAN/3/CAZO/KAUZ//KAUZ/4/WBLL1/5/TNMU/CBRD//MILAN/SHA7 | ISBW13T-230-0TR -0SD-010KUL-2MR-0MR |
| G-95 | HUBARA-3*2/SHUHA-4//AREEJ | ISBW13-298-0TR -0SD -0SD-05KUL-1MR-0MR |
| G-96 | 02W50807_1/4/BL2064//SW89.5124*2/FASAN/3/TILHI/5/HUBARA-3*2/SHUHA-4 | ISBW14-778-0TR -0SD-010KUL-5MR-0MR |
| G-97 | SERI.1B*2/3/KAUZ*2/BOW//KAUZ/4/02W50807/RSMF8 704 | ISBW14-904-0TR -0SD-010KUL-3MR-0MR |
| G-98 | 02W50807/4/OASIS/SKAUZ//4*BCN/3/2*PASTOR/5/HUBARA-3*2/SHUHA-4 | ISBW14-111-0TR -0SD-010KUL-2MR-0MR |
| G-99 | 02W50807_1/4/BL2064//SW89.5124*2/FASAN/3/TILHI/5/DOUMA 2 | ISBW14-733-0TR -0SD-010KUL-3MR-0MR |
| G-100 | MILAN/KAUZ//PASTOR/3/PASTOR/4/K7684.1/PRINIA | ICW 12-20474-0TR -0SD-010KUL-2MR-0MR |
| G-101 | 02W50807_1/4/BL2064//SW89.5124*2/FASAN/3/TILHI/5/BOBICHO | ISBW14-743-0TR -0SD-010KUL-1MR-0MR |
| G-102 | FRAME//MILAN/KAUZ/3/PASTOR/7/TILHI/5/PF74354//LD/ALD/4/2*BR12*2/3/JUP//PAR214*6/FB6631/6/ATTILA/2*PASTOR | ICW 12-20165-0TR -0SD-010KUL-3MR-0MR |
| G-103 | 02W50807/4/PFAU/SERI.1B//AMAD/3/WAXWING/5/ADEL-6 | ISBW14-474-0TR -0SD-010KUL-4MR-0MR |
| G-104 | HUBARA-3*2/SHUHA-4//BERKUME | ISBW13-288-0TR -0SD -0SD-05KUL-2MR-0MR |
| G-105 | SANDALL-3/4/PASTOR//HXL7573/2*BAU/3/HXL7573/2*BAU/5 /WORRAKATTA/2*PASTOR | ICW 11-20219-2AP -0SD -0SD-05KUL-2MR-0MR |
| G-106 | BABAX/LR42//BABAX/3/BAVIACORA/4/HEILO/5/SOKOLL | ISBW14-811-0TR -0SD-010KUL-7MR-0MR |
| G-107 | 02W50807_1/4/BL2064//SW89.5124*2/FASAN/3/TILHI/5/HUBARA-3*2/SHUHA-4 | ISBW14-779-0TR -0SD-010KUL-5MR-0MR |
| G-108 | 02W50807_1/4/PFAU/SERI.1B//AMAD/3/WAXWING/5/HUBARA-3*2/SHUHA-4 | ISBW14-795-0TR -0SD-010KUL-2MR-0MR |
| G-109 | 02W50807/RSMF8 704/4/ATENA-1/GAMDOW-3/3/MON'S'/ALD'S'//ALDAN'S'/IAS58 | ISBW14-96-0TR -0SD-010KUL-3MR-0MR |
| G-110 | PFAU/MILAN/5/CHEN/AEGILOPS SQUARROSA (TAUS)//BCN/3/VEE#7/BOW/4/PASTOR/6/REYNA-12/7/K7684.1/PRINIA | ICW 11-20498-4AP -0SD -0SD-05KUL-5MR-0MR |
| G-111 | 02W50807/4/PFAU/SERI.1B//AMAD/3/WAXWING/5/EGA-WENTWORTH | ISBW14-380-0TR -0SD-010KUL-2MR-0MR |
| G-112 | 02W50807/4/PFAU/SERI.1B//AMAD/3/WAXWING/5/ADEL-6 | ISBW14-460-0TR -0SD-010KUL-2MR-0MR |
| G-113 | PBW343*2/KHVAKI//BAVIACORA*2/3/HEILO/4/HUBARA-3*2/SHUHA-4 | ISBW14-36-0TR -0SD-010KUL-2MR-0MR |
| G-114 | MILAN/KAUZ//PASTOR/3/PASTOR/4/K7684.1/PRINIA | ICW 12-20474-0TR -0SD-010KUL-3MR-0MR |
| G-115 | 02W50807/4/PFAU/SERI.1B//AMAD/3/WAXWING/5/HUBARA-3*2/SHUHA-4 | ISBW14-175-0TR -0SD-010KUL-1MR-0MR |
| G-116 | 02W50807/4/PFAU/SERI.1B//AMAD/3/WAXWING/5/ATENA-1/GAMDOW-3/3/MON'S'/ALD'S'//ALDAN'S'/IAS58 | ISBW14-229-0TR -0SD-010KUL-2MR-0MR |
| G-117 | VEE#8//JUP/BJY/3/F3.71/TRM/4/BCN/5/KAUZ/6/PASTOR/7/PASTOR/8/SHAMISS-3/9/CROW'S'/BOW'S' -3-1994/95//TEVEE'S'/TADINIA | ICW 11-20140-1AP -0SD -0SD-05KUL-1MR-0MR |
| G-118 | SOONOT-10/HUBARA-15/3/MILAN/S87230//BABAX | ICW 11-20311-4AP-040KUL-020KUL-3MR-0MR-0KUL |
| G-119 | ATTILA*2/PBW65*2//MURGA/3/HUBARA-3/SHUHA-4 | ICW 11-00652-0TR -0SD -0SD-05KUL-7MR-0MR |
| G-120 | WAXWING*2/HEILO//HUBARA-3*2/SHUHA-4 | ICW 11-00670-0TR -0SD -0SD-05KUL-2MR-0MR |
| G-121 | UP2338*2/KKTS*2//YANAC/3/HUBARA-16/2*SOMAMA-3 | ICW 11-00733-0TR -0SD -0SD-05KUL-1MR-0MR |
| G-122 | KBIRD/5/KAUZ//ALTAR 84/AOS/3/MILAN/KAUZ/4/HUITES/6/HUBARA-3/SHUHA-4 | ICW 11-00778-0TR -0SD -0SD-05KUL-1MR-0MR |
| G-123 | KBIRD/5/KAUZ//ALTAR 84/AOS/3/MILAN/KAUZ/4/HUITES/6/HUBARA-3/SHUHA-4 | ICW 11-00778-0TR -0SD -0SD-05KUL-2MR-0MR |
| G-124 | KBIRD/5/KAUZ//ALTAR 84/AOS/3/MILAN/KAUZ/4/HUITES/6/HUBARA-3/SHUHA-4 | ICW 11-00778-0TR -0SD -0SD-05KUL-3MR-0MR |
| G-125 | NAC/TH.AC//3*PVN/3/MIRLO/BUC/4/2*PASTOR/5/KAUZ//ALTAR 84/AOS/3/MILAN/KAUZ/4/HUITES/6/KAUZ//ALTAR 84/AOS/3/MILAN/KAUZ/4/HUITES/7/HUBARA-3*2/SHUHA-4 | ICW 11-00802-0TR -0SD -0SD-05KUL-4MR-0MR |
| G-126 | MOUKA-4/RAYON//SIDS12 | ICWIP12-030 -029SD -0SD -0SD-05KUL-4MR-0MR |
| G-127 | HUBARA-2/QAFZAH-21//DOVIN-2/6/KADAR-1/4/VAN'S'/3/CNDR'S'/ANA//CNDR'S'/MUS'S'/5/SOMAMA-3 | ICWIP12-084 -034SD -0SD -0SD-05KUL-5MR-0MR |
| G-128 | USHER-18/5/DEBEIRA/4/KAUZ//ALTAR 84/AOS/3/KAUZ | ICWIP13-45 -0SD-050KUL-020KUL-6MR-0MR |
| G-129 | KAUZ'S'/SERI/4/SERI.1B*2/3/KAUZ*2/BOW//KAUZ/6/ATRIS-10/4/PASTOR /3/KAUZ*2/ OPATA//KAUZ/5/CHAM-6/TUI'S' | ICWIP13-73 -0SD-050KUL-020KUL-4MR-0MR |
| G-130 | HAMAM-2/DEEK-2//GIZA-168/3/Axe | ICWIP13-255 -0SD-050KUL-020KUL-3MR-0MR |
| G-131 | HUBARA-16/2*SOMAMA-3/4/HUBARA-8/3/MON'S'/ALD'S'//BOW'S'/5/ATTILA-7/KATILA-12 | ICWIP13-298 -0SD-050KUL-020KUL-4MR-0MR |
| G-132 | BOW #1/FENGKANG 15//NESMA*2/261-9/3/DUCULA/4/SAKHA-94/5/GEMMIZA-12 | ICWIP13-313 -0SD-050KUL-020KUL-5MR-0MR |
| G-133 | SOONOT-10/HUBARA-15/3/MILAN/S87230//BABAX | ICW 11-20311-4AP-040KUL-020KUL-3MR-0MR |
| G-134 | HUBARA-3*2/SHUHA-4//HUBARA-3*2/SHUHA-4 | ISBW13-309-0TR-040KUL-020KUL-1MR-0MR |
| G-135 | HUBARA-3*2/SHUHA-4//HUBARA-3*2/SHUHA-4 | ISBW13-309-0TR-040KUL-020KUL-3MR-0MR |
| G-136 | HUBARA-3*2/SHUHA-4//NARC 2011 | ISBW13-427-0TR-040KUL-020KUL-3MR-0MR |
| G-137 | HUBARA-3*2/SHUHA-4//NARC 2011 | ISBW13-427-0TR-040KUL-020KUL-5MR-0MR |
| G-138 | HUBARA-3*2/SHUHA-4//NARC 2011 | ISBW13-427-0TR-040KUL-020KUL-6MR-0MR |
| G-139 | Pirsabak 2008/BASHIR | ISBW13-474-0TR-040KUL-020KUL-5MR-0MR |
| G-140 | Saleem-2000/BASHIR | ISBW13-505-0TR-040KUL-020KUL-1MR-0MR |
| G-141 | GEMMIZA-12/SIDS-12 | ICARC-WIP13385-0TR-040KUL-020KUL-4MR-0MR |
| G-142 | CAL/NH//H567.71/3/SERI/4/CAL/NH//H567.71/5/2*KAUZ/6/PASTOR/7/YANAC/8/CAL/NH//H567.71/3/SERI/4/CAL/NH//H567.71/5/2*KAUZ/6/PASTOR/9/SANDALL-3 | ICW 11-00601-0TR-040KUL-020KUL-5MR-0MR |
| G-143 | KBIRD/5/KAUZ//ALTAR 84/AOS/3/MILAN/KAUZ/4/HUITES/6/HUBARA-3/SHUHA-4 | ICW 11-00778-0TR-040KUL-020KUL-4MR-0MR |
| G-144 | KBIRD/5/KAUZ//ALTAR 84/AOS/3/MILAN/KAUZ/4/HUITES/6/HUBARA-3/SHUHA-4 | ICW 11-00778-0TR-040KUL-020KUL-7MR-0MR |
| G-145 | PBW343*2/KUKUNA/3/PGO/SERI//BAV92/4/NABUQ-6 | ICW 11-00786-0TR-040KUL-020KUL-6MR-0MR |
| G-146 | C80.1/3*BATAVIA//2*WBLL1/3/2*FRET2/TUKURU//FRET2/4/MILAN/S87230//BABAX | ICW 11-00798-0TR-040KUL-020KUL-1MR-0MR |
| G-147 | NAC/TH.AC//3*PVN/3/MIRLO/BUC/4/2*PASTOR/5/KAUZ//ALTAR 84/AOS/3/MILAN/KAUZ/4/HUITES/6/KAUZ//ALTAR 84/AOS/3/MILAN/KAUZ/4/HUITES/7/HUBARA-3*2/SHUHA-4 | ICW 11-00802-0TR-040KUL-020KUL-6MR-0MR |
| G-148 | SUNCO/2*PASTOR/3/WHEAR/KUKUNA//WHEAR | ICW 11-00860-0TR-040KUL-020KUL-2MR-0MR |
| G-149 | HUBARA-3*2/SHUHA-4//LALOUB-2 | ICW 11-01026-0TR-040KUL-020KUL-4MR-0MR |
| G-150 | HUBARA-3*2/SHUHA-4//SHAMISS-4 | ICW 11-01028-0TR-040KUL-020KUL-2MR-0MR |
| G-151 | Millenium/RUTH-2 | ICW 11-01105-0TR-040KUL-020KUL-6MR-0MR |
| G-152 | CHAM-6/AGUILAL | ICW-TR 10-00249-1AP-0TR-0MR-5MR-0MR |
| G-153 | ATTILA-7/KBG-01 | ICW-TR 10-00263-7AP-0TR-0MR-3MR-0MR |
| G-154 | SANDALL-3/GOUMRIA-3 | ICW-TR 10-00388-1AP-0TR-0MR-3MR-0MR |
| G-155 | BJY/COC//PRL/BOW/3/JAWAHIR-19/SAMIRA-7 | ICW-TR 10-20059-5AP-1AP-0TR-0MR-3MR-0MR |
| G-156 | YAR/AE.SQUARROSA (783)/4/GOV/AZ//MUS/3/SARA/5/MYNA/VUL//JUN/6/REYNA-16 | ICW-TR 10-00238-1AP-0TR-0MR-3MR-0MR |
| G-157 | WBLL1*2/KURUKU//HEILO/3/WBLL1*2/KURUKU/4/HUBARA-3*2/SHUHA-4 | ICW 11-00673-0TR-0MR-4MR-0MR |
| G-158 | WBLL1*2/KURUKU//HEILO/3/WBLL1*2/KURUKU/4/HUBARA-3*2/SHUHA-4 | ICW 11-00673-0TR-0MR-5MR-0MR |
| G-159 | KBIRD/5/KAUZ//ALTAR 84/AOS/3/MILAN/KAUZ/4/HUITES/6/PRL/2*PASTOR/4/CHOIX/STAR/3/HE1/3*CNO79//2*SERI | ICW 11-00774-0TR-0MR-3MR-0MR |
| G-160 | KBIRD//INQALAB 91*2/TUKURU/3/HUBARA-3/SHUHA-4 | ICW 11-00781-0TR-0MR-5MR-0MR |
| G-161 | PBW343*2/KUKUNA/3/PGO/SERI//BAV92/4/HUBARA-3/SHUHA-4 | ICW 11-00785-0TR-0MR-5MR-0MR |
| G-162 | ATTILA-7 //HUBARA-3*2/SHUHA-4-1 | ISBW13-030-0TR-0MR-3MR-0MR |
| G-163 | ATTILA-7 //HUBARA-3*2/SHUHA-4 | ISBW13-031-0TR-0MR-1MR-0MR |
| G-164 | SHUHA-4/FLORKWA-4//HUBARA-3/6/88ZHONG218//CTK/VEE/3/KVZ/GV//PR/4/KRASNOVODOPADSKAYA25/5/KS82117/MLT | ISBW13-405-0TR-0MR-3MR-0MR |
| G-165 | KARAWAN-1/TALLO 3//REGRAG-1/3/OUASSOU-11 | ISBW13-674-0TR-0MR-7MR-0MR |
| G-166 | QAFZAH-25/ANGI-1//HAIEL-1/4/VEE/PJN//2*TUI/3/WH576 | ICARC-WIP13190-0TR-0MR-3MR-0MR |
| G-167 | MILAN/KAUZ//PRINIA/3/BABAX/4/PASTOR/3/KAUZ*2/OPATA//KAUZ/5/REYNA-17 | ICW 11-20106-3AP-0MR-4MR-0MR |
| G-168 | CHAM-6/PERW//MILAN/PASTOR/3/CHAM-6/PERW/4/NADER | ISBW13-439-0TR -0SD -0SD-2SD -0SD |
| G-169 | SERI.1B//KAUZ/HEVO/3/AMAD/4/HXL8246/KAUZ/6/REYNA-4//KAMB2/PANDION/5/PRL/2*PASTOR//SERI/4/MILAN/KAUZ//PRINIA/3/BABAX | ISBW15TC-TR-246 -0SD-010KUL-5KUL |
| G-170 | 4WON-IR-257/5/YMH/HYS//HYS/TUR3055/3/DGA /4/ VPM / MOS/7/BABAX/LR42//BABAX/3/BAVIACORA/4/HEILO/5/LAKTA-1/QAFZAH-21/6/HUBARA-5/ANGI-1 | ISBW15TC-TR-344 -0SD-010KUL-5KUL |
| G-171 | Guna = SERI.1B//KAUZ/HEVO/3/AMAD/4/KAUZ/GYS//KAUZ/7/PASTOR/3/GEN*2//BUC/FLK/4/PASTOR/5/KAMB2/PANDION/6/02W50807/RSMF8 704 | ISBW15TC-TR-261 -0SD-010KUL-4KUL |
| G-172 | SERI.1B//KAUZ/HEVO/3/AMAD/4/KAUZ/GYS//KAUZ/5/RIL 148 | ISBW15-TR-1128-0SD-010KUL-2KUL |
| G-173 | HEILO/3/OASIS/SKAUZ//4*BCN/4/Av 36-29-34#20 | ISBW15-TR-674 -0SD-010KUL-3KUL |
| G-174 | 02W50807_1/4/PFAU/SERI.1B//AMAD/3/WAXWING/5/Av 36-29-34#20 | ISBW15-TR-909 -0SD-010KUL-KUL-3KUL |
| G-175 | CACHANILLA F2000*2/3/IRIHEA/BABAX//PASTOR/4/DORADE-5//KS82117/MLT | ISBW15-SxW-TR-250 -0SD-010KUL-3KUL |
| G-176 | SERI.1B//KAUZ/HEVO/3/AMAD/4/KAUZ/GYS//KAUZ/5/RIL 148 | ISBW15-TR-1128-0SD-010KUL-5KUL |
| G-177 | KAMB2/PANDION//Av Yr 15 | ISBW15-TR-368 -0SD-010KUL-2KUL |
| G-178 | HEILO/MIRIAM 41/6/VEE/PJN//2*TUI/3/2*MILAN/KAUZ/4/ATTILA/HEILO/5/BUMPER | ISBW15TC-TR-16 -0SD-010KUL-5KUL |
| G-179 | CROC_1/AE.SQUARROSA (205)//KAUZ/3/2*KAUZ*2/YACO//KAUZ/4/ERYT783-96/SHARK-1 | ISBW15-SxW-TR-391 -0SD-010KUL-5KUL |
| G-180 | HEILO/3/OASIS/SKAUZ//4*BCN/6/4WON-IR-257/5/YMH/HYS//HYS/TUR3055/3/DGA /4/ VPM / MOS /7/SERI.1B//KAUZ/HEVO/3/AMAD/4/KAUZ/GYS//KAUZ/5/02W50807/4/PFAU/SERI.1B//AMAD/3/WAXWING | ISBW15 T-TR-144 -0SD-010KUL-4KUL |
| G-181 | ATRAK/5/KAUZ/3/MYNA/VUL//BUC/FLK/4/MILAN/7/PASTOR/3/GEN*2//BUC/FLK/4/PASTOR/5/CROC_1/AE.SQUARROSA (205)//KAUZ/3/2*KAUZ*2/YACO//KAUZ/6/02W50807/RSMF8 704 | ISBW15TC-TR-03 -0SD-010KUL-3KUL |
| G-182 | HEILO/3/SW89.5277/BORL95//SKAUZ/7/PASTOR/3/GEN*2//BUC/FLK/4/PASTOR/5/CROC_1/AE.SQUARROSA (205)//KAUZ/3/2*KAUZ*2/YACO//KAUZ/6/02W50807/RSMF8 704 | ISBW15TC-TR-160 -0SD-010KUL-1KUL |
| G-183 | 02W50807/RSMF8 704/7/ATTILA/4/WEAVER/TSC//WEAVER/3/WEAVER/5/ ATTILA/2*PASTOR//FISCAL/6/DOUKKALA-34 | ISBW15TC-TR-189 -0SD-010KUL-5KUL |
| G-184 | Guna = SERI.1B//KAUZ/HEVO/3/AMAD/4/KAUZ/GYS//KAUZ/7/PASTOR/3/GEN*2//BUC/FLK/4/PASTOR/5/KAMB2/PANDION/6/02W50807/RSMF8 704 | ISBW15TC-TR-261 -0SD-010KUL-2KUL |
| G-185 | TEMERIND-5/Solh/7/HEILO/3/SW89.5277/BORL95//SKAUZ/6/02W50807/5/PSN/BOW//SERI/3/MILAN/4/ATTILA | ISBW15 T-TR-154 -0SD-010KUL-1KUL |
| G-186 | SHARP/3/PRL/SARA//TSI/VEE#5/5/VEE/LIRA//BOW/3/BCN/4/KAUZ/6/MILAN/PASTOR/7/SUDAN#3/SHUHA-6 | ICW 11-20095-5AP -0SD -0SD-05KUL-1MR-0MR |

Additional file 1: Supplementary Table 2. List of bread wheat genotypes resistant to yellow rust

| S.N | Name/Pedigree | CI |
| --- | --- | --- |
| 1 | SW89-5124*2/FASAN/3/CAZO/KAUZ//KAUZ/4/WBLL1/5/TNMU/CBRD//MILAN/SHA7 | 3.09 |
| 2 | KARAWAN-1/TALLO 3//JADIDA-2/3/TOROS | 5.49 |
| 3 | HUBARA-5/PASTOR-2/6/88ZHONG218//CTK/VEE/3/KVZ/GV//PR/4/KRASNOVODOPADSKAYA25/5/KS82117/MLT | 7.67 |
| 4 | 02W50807/4/PFAU/SERI.1B//AMAD/3/WAXWING/5/ATENA-1/GAMDOW-3/3/MON'S'/ALD'S'//ALDAN'S'/IAS58 | 8.40 |
| 5 | Millenium/RUTH-2 | 8.51 |
| 6 | SW89-5124*2/FASAN/3/CAZO/KAUZ//KAUZ/4/WBLL1/5/TNMU/CBRD//MILAN/SHA7 | 9.21 |
| 7 | SOONOT-10/HUBARA-15/3/MILAN/S87230//BABAX | 9.47 |
| 8 | HEILO/3/OASIS/SKAUZ//4*BCN/6/4WON-IR-257/5/YMH/HYS//HYS/TUR3055/3/DGA /4/ VPM / MOS /7/SERI.1B//KAUZ/HEVO/3/AMAD/4/KAUZ/GYS//KAUZ/5/02W50807/4/PFAU/SERI.1B//AMAD/3/WAXWING | 9.49 |
| 9 | SHARP/3/PRL/SARA//TSI/VEE#5/5/VEE/LIRA//BOW/3/BCN/4/KAUZ/6/MILAN/PASTOR/7/SUDAN#3/SHUHA-6 | 10.04 |
| 10 | REBWAH-12/5/ATTILA/3/URES/PRL//BAV92/4/WBLL1 | 11.09 |
| 11 | KARAWAN-1/TALLO 3//REGRAG-1/3/OUASSOU-11 | 13.05 |
| 12 | SOONOT-10/HUBARA-15/3/MILAN/S87230//BABAX | 13.22 |
| 13 | KAMB2/PANDION//Av Yr 15 | 13.36 |
| 14 | SHARP/3/PRL/SARA//TSI/VEE#5/5/VEE/LIRA//BOW/3/BCN/4/KAUZ/6/K7684.1/PRINIA | 14.58 |
| 15 | NEJMAH-12/Mace | 14.77 |
| 16 | 02W50807_1/4/BL2064//SW89.5124*2/FASAN/3/TILHI/5/HUBARA-3*2/SHUHA-4 | 14.82 |
| 17 | NAC/TH.AC//3*PVN/3/MIRLO/BUC/4/2*PASTOR/5/KAUZ//ALTAR 84/AOS/3/MILAN/KAUZ/4/HUITES/6/KAUZ//ALTAR 84/AOS/3/MILAN/KAUZ/4/HUITES/7/HUBARA-3*2/SHUHA-4 | 15.41 |
| 18 | BABAX/LR42//BABAX/3/BAVIACORA/4/HEILO/5/SOKOLL | 15.87 |
| 19 | 02W50807/RSMF8 704/4/ATENA-1/GAMDOW-3/3/MON'S'/ALD'S'//ALDAN'S'/IAS58 | 16.05 |
| 20 | MILAN/KAUZ//PASTOR/3/PASTOR/4/K7684.1/PRINIA | 16.47 |
| 21 | KARAWAN-1/TALLO 3//REGRAG-1/3/OUASSOU-11 | 17.22 |
| 22 | SUNTOP/4/SERI.1B*2/3/KAUZ*2/BOW//KAUZ | 17.40 |
| 23 | REYNA-13/MASSIRA//SOONOT-10 | 17.43 |
| 24 | 02W50807_1/4/BL2064//SW89.5124*2/FASAN/3/TILHI/5/DOUMA 2 | 17.46 |
| 25 | 02W50807/4/PFAU/SERI.1B//AMAD/3/WAXWING/5/EGA-WENTWORTH | 17.60 |
| 26 | NAC/TH.AC//3*PVN/3/MIRLO/BUC/4/2*PASTOR/5/KAUZ//ALTAR 84/AOS/3/MILAN/KAUZ/4/HUITES/6/KAUZ//ALTAR 84/AOS/3/MILAN/KAUZ/4/HUITES/7/HUBARA-3*2/SHUHA-4 | 17.80 |
| 27 | QAFZAH-33/FLORKWA-2//Excalibur/3/DOUKKALA-33 | 18.95 |
| 28 |  | 19.00 |
| 29 | 4WON-IR-257/5/YMH/HYS//HYS/TUR3055/3/DGA /4/ VPM / MOS/7/BABAX/LR42//BABAX/3/BAVIACORA/4/HEILO/5/LAKTA-1/QAFZAH-21/6/HUBARA-5/ANGI-1 | 19.0557 |
| 30 | HUBARA-3*2/SHUHA-4//HIDDAB/FLORKWA-2 | 19.07 |
| 31 | KBIRD/5/KAUZ//ALTAR 84/AOS/3/MILAN/KAUZ/4/HUITES/6/HUBARA-3/SHUHA-4 | 19.45 |
| 32 | TEVEE-1/STAR'S'/3/ACHTAR*3//KANZ/KS85-8-4/4/SAKHA-93 | 19.55 |
| 33 | KBIRD/5/KAUZ//ALTAR 84/AOS/3/MILAN/KAUZ/4/HUITES/6/HUBARA-3/SHUHA-4 | 19.82 |

Additional file 1: Supplementary Table 3. Marker trait association (MTAs) with significant SNP markers

| Marker | Chr | Pos | pValue | R2 | LOD | Environment |
| --- | --- | --- | --- | --- | --- | --- |
| BobWhite_c33344_143 | 3B | 751353576 | 0.000624 | 0.059912 | 3.205074 | Adet 2023 |
| AX-86174566 | 3D | 84614751 | 0.000521 | 0.061511 | 3.282785 | Adet 2023 |
| wsnp_Ex_c9822_16203685 | 5D | 346316445 | 0.000422 | 0.063387 | 3.37422 | Adet 2023 |
| BobWhite_c8366_563 | 7A | 141746321 | 0.000945 | 0.05619 | 3.024608 | Adet 2023 |
| Kukri_c25451_119 | 7A | 675552546 | 0.000684 | 0.059091 | 3.165198 | Adet 2023 |
| Excalibur_c18631_169 | 7A | 740518144 | 0.000823 | 0.057426 | 3.084491 | Adet 2023 |
| AX-94668843 | 3A | 523072019 | 7.39E-05 | 0.07875 | 4.131327 | Dabat 2023 |
| wsnp_CAP8_c6939_3242530 | 3A | 714861585 | 0.000189 | 0.070516 | 3.72348 | Dabat 2023 |
| CAP11_c1022_66 | 3A | 714861880 | 2.06E-06 | 0.109125 | 5.686468 | Dabat 2023 |
| Tdurum_contig42495_389 | 3A | 715003409 | 9.09E-05 | 0.076941 | 4.041245 | Dabat 2023 |
| AX-111065273 | 3B | 23278618 | 0.000392 | 0.064052 | 3.406617 | Dabat 2023 |
| Ku_c27771_508 | 3B | 508816336 | 0.000783 | 0.057875 | 3.106253 | Dabat 2023 |
| AX-111494910 | 3B | 518817756 | 0.000447 | 0.062892 | 3.350082 | Dabat 2023 |
| AX-111473451 | 3B | 520254396 | 0.000188 | 0.070541 | 3.724727 | Dabat 2023 |
| AX-86181093 | 3B | 520794345 | 0.000366 | 0.064652 | 3.435952 | Dabat 2023 |
| BS00052423_51 | 3B | 523277044 | 0.000825 | 0.057409 | 3.083671 | Dabat 2023 |
| AX-108848182 | 3B | 524704380 | 0.000238 | 0.068484 | 3.623561 | Dabat 2023 |
| AX-95148741 | 3D | 390863993 | 0.000973 | 0.055923 | 3.011719 | Dabat 2023 |
| AX-95103627 | 5A | 364174334 | 0.00014 | 0.073176 | 3.854672 | Dabat 2023 |
| TA001900-1836 | 5A | 560799588 | 0.000255 | 0.067855 | 3.592732 | Dabat 2023 |
| BS00062618_51 | 5B | 679339398 | 0.000669 | 0.059283 | 3.174543 | Dabat 2023 |
| BS00029348_51 | 5B | 679482195 | 4.05E-05 | 0.083967 | 4.392446 | Dabat 2023 |
| BobWhite_c6685_1922 | 5B | 680182399 | 0.000127 | 0.07402 | 3.896406 | Dabat 2023 |
| wsnp_Ku_c7811_13387117 | 5D | 538909618 | 7.89E-05 | 0.078182 | 4.103024 | Dabat 2023 |
| wsnp_JD_c8978_9893945 | 5D | 541819750 | 0.000114 | 0.074952 | 3.942565 | Dabat 2023 |
| RFL_Contig1622_1433 | 6A | 12992655 | 0.000868 | 0.056952 | 3.06153 | Dabat 2023 |
| AX-158588344 | 6A | 13707884 | 0.000779 | 0.057923 | 3.108537 | Dabat 2023 |
| Kukri_c49017_404 | 6A | 13787254 | 0.000185 | 0.070723 | 3.733679 | Dabat 2023 |
| wsnp_CAP8_c6680_3136899 | 6A | 14228736 | 5.81E-05 | 0.080844 | 4.235844 | Dabat 2023 |
| CAP11_rep_c5191_192 | 6D | 12449311 | 0.000568 | 0.060743 | 3.245473 | Dabat 2023 |
| BS00022032_51 | UN | 44242716 | 0.000319 | 0.065881 | 3.496017 | Dabat 2023 |
| RAC875_c42648_115 | 2A | 720056857 | 0.000758 | 0.058172 | 3.120605 | Koga 2023 |
| CAP11_c1022_66 | 3A | 714861880 | 0.000991 | 0.055766 | 3.004109 | Koga 2023 |
| JD_c7714_954 | 3A | 735468099 | 0.000151 | 0.072523 | 3.82242 | Koga 2023 |
| AX-108848182 | 3B | 524704380 | 0.000943 | 0.05621 | 3.025584 | Koga 2023 |
| Kukri_c43464_89 | 3D | 606973615 | 0.000752 | 0.058235 | 3.12368 | Koga 2023 |
| D_F1BEJMU01DVMII_118 | 3D | 607006133 | 0.000591 | 0.060393 | 3.228441 | Koga 2023 |
| wsnp_Ex_c25945_35205959 | 3D | 607120606 | 0.000531 | 0.061342 | 3.274604 | Koga 2023 |
| Excalibur_c51312_218 | 3D | 607583193 | 0.000452 | 0.062776 | 3.344407 | Koga 2023 |
| Kukri_c14943_753 | 3D | 607772286 | 0.000247 | 0.068158 | 3.607599 | Koga 2023 |
| wsnp_Ex_c28705_37809171 | 3D | 608416658 | 0.00033 | 0.065586 | 3.481586 | Koga 2023 |
| AX-94481898 | 7B | 654746155 | 0.000262 | 0.06764 | 3.582177 | Koga 2023 |
| BS00102646_51 | UN | 22345654 | 0.000663 | 0.059365 | 3.178491 | Koga 2023 |
| BS00022032_51 | UN | 44242716 | 0.000323 | 0.065762 | 3.490186 | Koga 2023 |
| Tdurum_contig53772_362 | 1B | 635049168 | 0.000824 | 0.057415 | 3.083947 | Kulumsa 2023 |
| TA004478-0271 | 2B | 151585564 | 0.000788 | 0.057816 | 3.10336 | Kulumsa 2023 |
| RAC875_s120635_196 | 2D | 175296358 | 0.000934 | 0.05629 | 3.029474 | Kulumsa 2023 |
| AX-109922216 | 3A | 695745846 | 0.000208 | 0.069685 | 3.682603 | Kulumsa 2023 |
| wsnp_CAP8_c6939_3242530 | 3A | 714861585 | 7.36E-06 | 0.098507 | 5.132867 | Kulumsa 2023 |
| CAP11_c1022_66 | 3A | 714861880 | 1.03E-07 | 0.133204 | 6.987707 | Kulumsa 2023 |
| Tdurum_contig42495_389 | 3A | 715003409 | 0.000124 | 0.074204 | 3.905539 | Kulumsa 2023 |
| AX-158541294 | 3A | 715124486 | 0.000478 | 0.062288 | 3.320609 | Kulumsa 2023 |
| BS00023222_51 | 3A | 715286393 | 4.01E-05 | 0.084048 | 4.396513 | Kulumsa 2023 |
| IACX6214 | 3B | 24063182 | 0.000989 | 0.055784 | 3.004975 | Kulumsa 2023 |
| AX-158538911 | 5A | 633316482 | 0.000319 | 0.065874 | 3.495652 | Kulumsa 2023 |
| AX-94535751 | 5B | 672193892 | 0.000767 | 0.058063 | 3.11536 | Kulumsa 2023 |
| BS00029348_51 | 5B | 679482195 | 0.000162 | 0.071868 | 3.790111 | Kulumsa 2023 |
| BobWhite_c6685_1922 | 5B | 680182399 | 0.000205 | 0.069788 | 3.687664 | Kulumsa 2023 |
| BS00022673_51 | 5D | 479544639 | 0.000338 | 0.065367 | 3.470859 | Kulumsa 2023 |
| wsnp_Ku_c7811_13387117 | 5D | 538909618 | 3.65E-05 | 0.084876 | 4.4382 | Kulumsa 2023 |
| wsnp_JD_c8978_9893945 | 5D | 541819750 | 0.00023 | 0.068783 | 3.638264 | Kulumsa 2023 |
| wsnp_Ex_c5296_9365860 | 6A | 368057710 | 0.000763 | 0.058106 | 3.117426 | Kulumsa 2023 |
| IAAV5907 | 7D | 573739701 | 0.000134 | 0.073558 | 3.873555 | Kulumsa 2023 |
| Tdurum_contig93830_1688 | UN | 22311519 | 0.000296 | 0.066537 | 3.528103 | Kulumsa 2023 |
| BS00102646_51 | UN | 22345654 | 4.96E-05 | 0.082219 | 4.304705 | Kulumsa 2023 |
| GENE-0063_68 | 1D | 478155896 | 0.000673 | 0.059225 | 3.171728 | Kulumsa 2024 |
| AX-94989051 | 2B | 271474471 | 0.000646 | 0.059599 | 3.189857 | Kulumsa 2024 |
| IACX6214 | 3B | 24063182 | 0.000577 | 0.060611 | 3.239012 | Kulumsa 2024 |
| AX-110909431 | 3B | 734159875 | 0.000717 | 0.058665 | 3.144521 | Kulumsa 2024 |
| wsnp_Ra_c16476_25132652 | 4A | 629354025 | 0.000978 | 0.055879 | 3.009603 | Kulumsa 2024 |
| Kukri_c33315_159 | 4A | 630266188 | 0.000786 | 0.057846 | 3.10483 | Kulumsa 2024 |
| AX-94429025 | 5A | 567684583 | 0.000901 | 0.056613 | 3.045099 | Kulumsa 2024 |

Chr: chromosome on which the SNP is located, Pos: position of the SNP on the Chromosome, pvalue: P-value for the SNP, effect: effect of the SNP on the trait value, R2: likelihood-ratio-based R2, LOD: LOD score for the SNP, defined as–log10(p-Value)
