# Supplementary material for: Genetic Diversity and Genome-Wide Association Study of Yellow Rust Resistance in Elite Spring Bread Wheat Genotypes in Ethiopia
Source: Research Square preprint supplement (doi:10.21203/rs.3.rs-7378917/v1), 2025-09-04
Supplement: Supplementary file 2 [file d6bd09d941107601c246dbb0.docx]

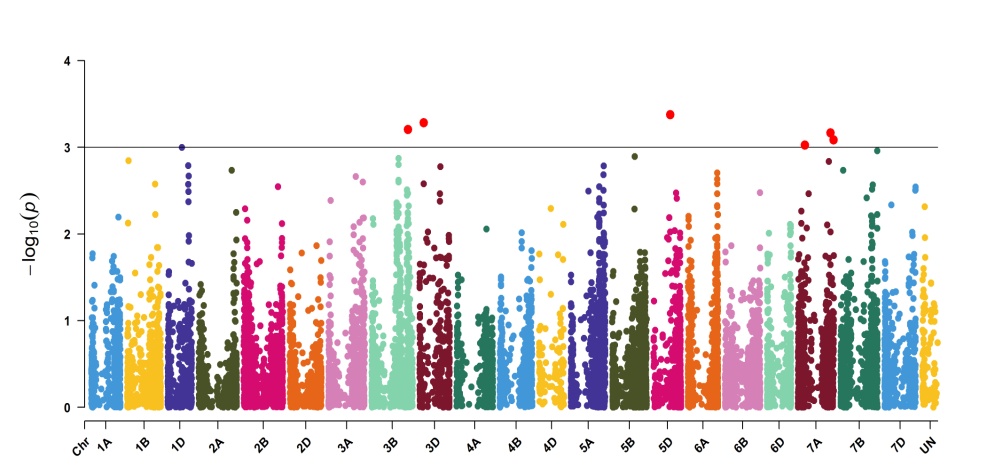

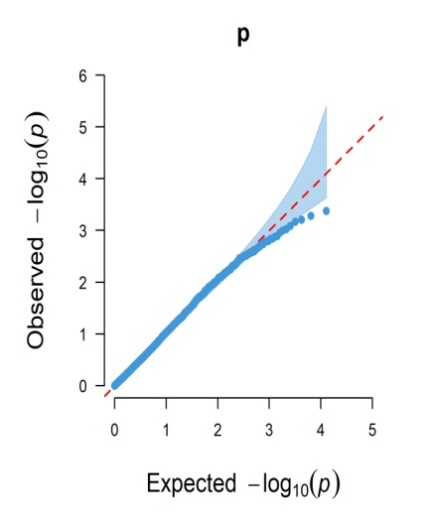


Adet 2023


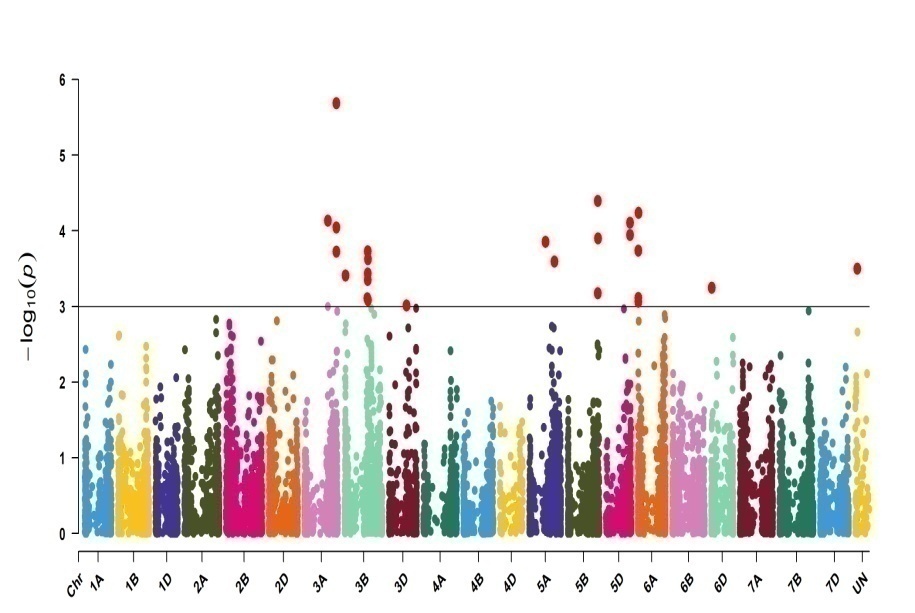

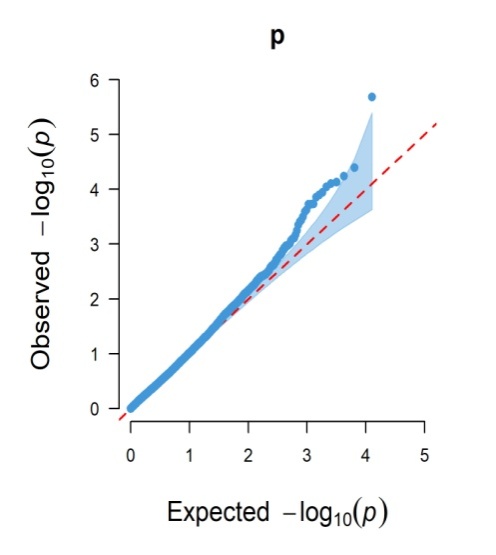


Dabat 2023


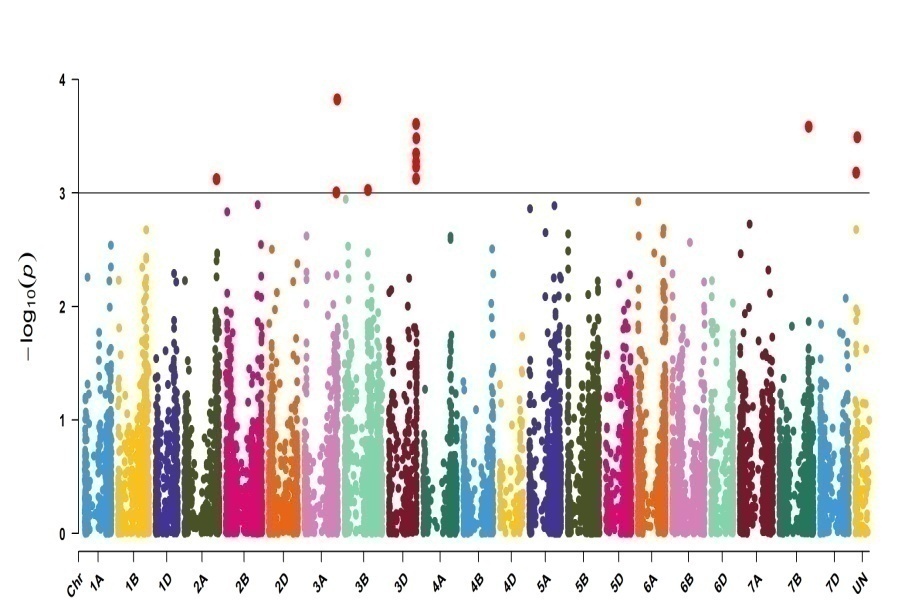

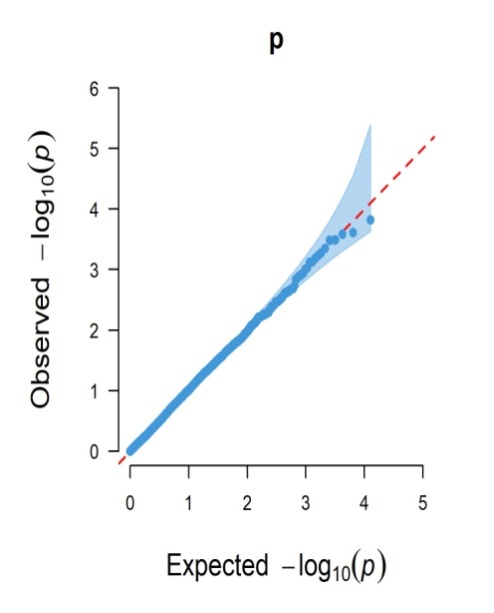


Koga 2023


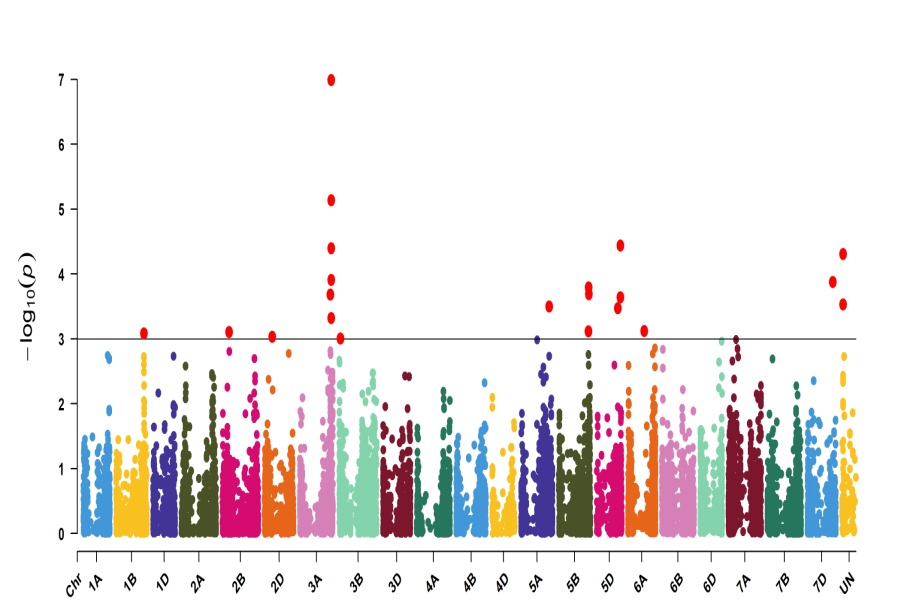

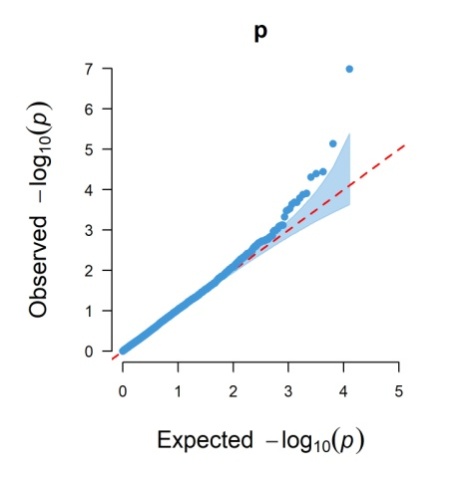


Kulumsa 2023


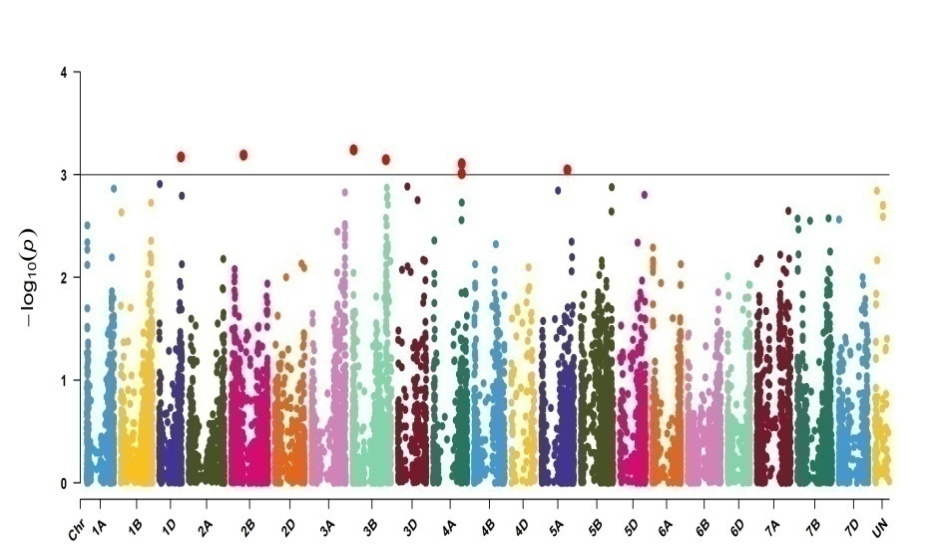

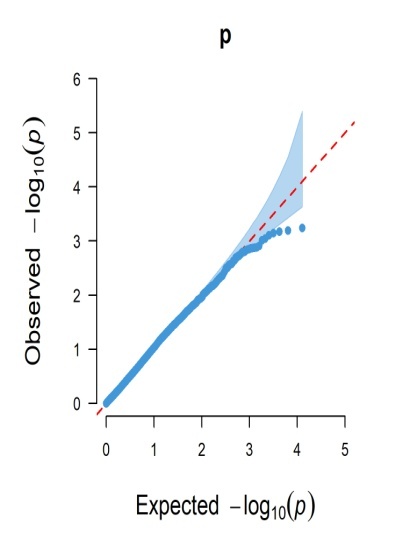


Kulumsa 2024

**Additional file 2: Supplementary Fig.1**. Manhattan plot and Q-Q plot of the GWAS result for yellow rust resistance in 186 bread wheat lines in five testing environments (Adet2023, Dabat2023, Koga2023, Kulumsa2023, and Kulumsa2024). Each dot represents a single SNP. On the left side is the Manhattan plot of the –log10 of the p-values versus genomic distance of the SNPs significantly associated with yellow rust resistance at thresholds above 3 indicates significant SNPs. The Q-Q plots on the right side of the Manhattan plots shows how well the GWAS model accounted population structure and kinship for CI for yellow rust.
